# Supplementary material
Source: PubMed Central journal article supplement (PMC4691554)

**Appendix**  
**National and State-Specific Sales and Prices for Electronic Cigarettes—U.S., 2012–2013**  
**Loomis et al.**

**Appendix Figure 1.** Disposable e-cigarettes (left), starter kit (center), cartridge refills (right)

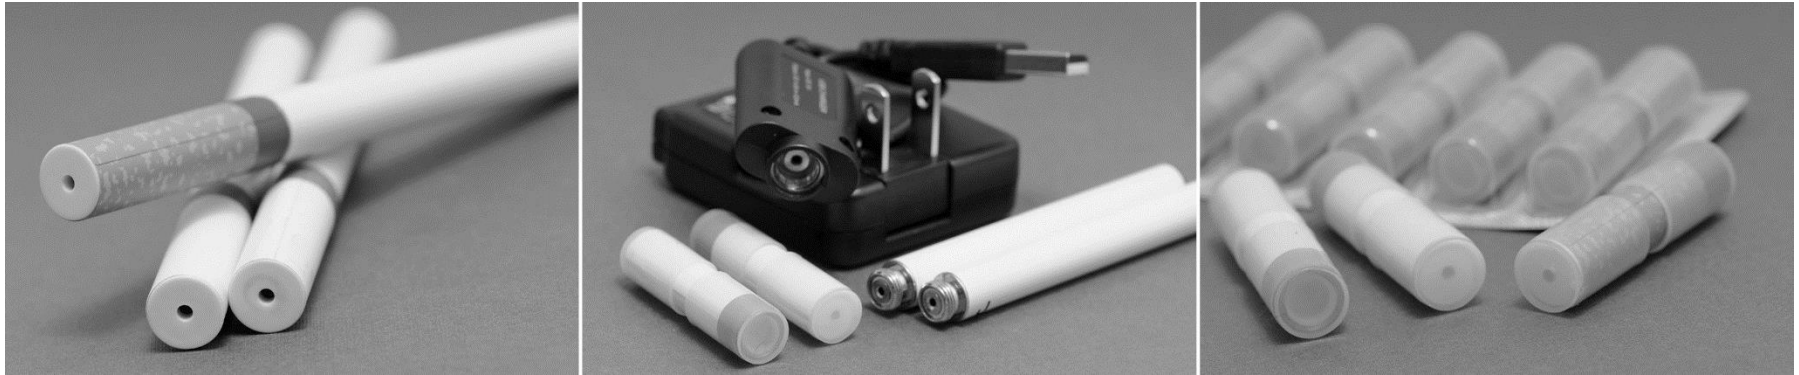

Supplement: NIHMS709979-supplement-Appendix_A.pdf [file NIHMS709979-supplement-Appendix_A.pdf]
